## Correction: Tumor-associated macrophages promote tumor metastasis via the TGF- $\beta$ /SOX9 axis in non-small cell lung cancer

Shuai Zhang<sup>1</sup>, Dehai Che<sup>1</sup>, Fang Yang<sup>1</sup>, Chunling Chi<sup>2</sup>, Hongxue Meng<sup>3</sup>, Jing Shen<sup>1</sup>, Li Qi<sup>4</sup>, Fang Liu<sup>1</sup>, Liyan Lv<sup>5</sup>, Yue Li<sup>1</sup>, Qingwei Meng<sup>1</sup>, Junning Liu<sup>6</sup>, Lihua Shang<sup>1</sup> and Yan Yu<sup>1</sup>

<sup>1</sup>The Sixth Department of Medical Oncology, Harbin Medical University Cancer Hospital, Harbin, China

<sup>2</sup>Department of Neurology, The Fourth Affiliated Hospital of Harbin Medical University, Harbin, China

<sup>3</sup>Department of Pathology, Harbin Medical University Cancer Hospital, Harbin, China

<sup>4</sup>Department of Oncology, The Second Affiliated Hospital of Harbin Medical University, Harbin, China

<sup>5</sup>Department of Oncology, The First Affiliated Hospital of Harbin Medical University, Harbin, China

<sup>6</sup>Department of Oncology, The First Affiliated Hospital of Qiqihar Medical College, Qiqihar, China

**Published:** December 29, 2020

**Copyright:** © 2020 Zhang et al. This is an open access article distributed under the terms of the [Creative Commons Attribution License](https://creativecommons.org/licenses/by/3.0/) (CC BY 3.0), which permits unrestricted use, distribution, and reproduction in any medium, provided the original author and source are credited.

**This article has been corrected:** Due to errors in image selection, the pictures of H1299 cell morphology treated with recombinant TGF- $\beta$  and TGF- $\beta$  receptor inhibitor in Figure 5A are incorrect. When preparing the results, the control group data was mistakenly copied and presented as the treatment group. The corrected Figure 5 is shown below. The authors declare that these corrections do not change the results or conclusions of this paper.

Original article: Oncotarget. 2017; 8:99801–99815. <https://doi.org/10.18632/oncotarget.21068>

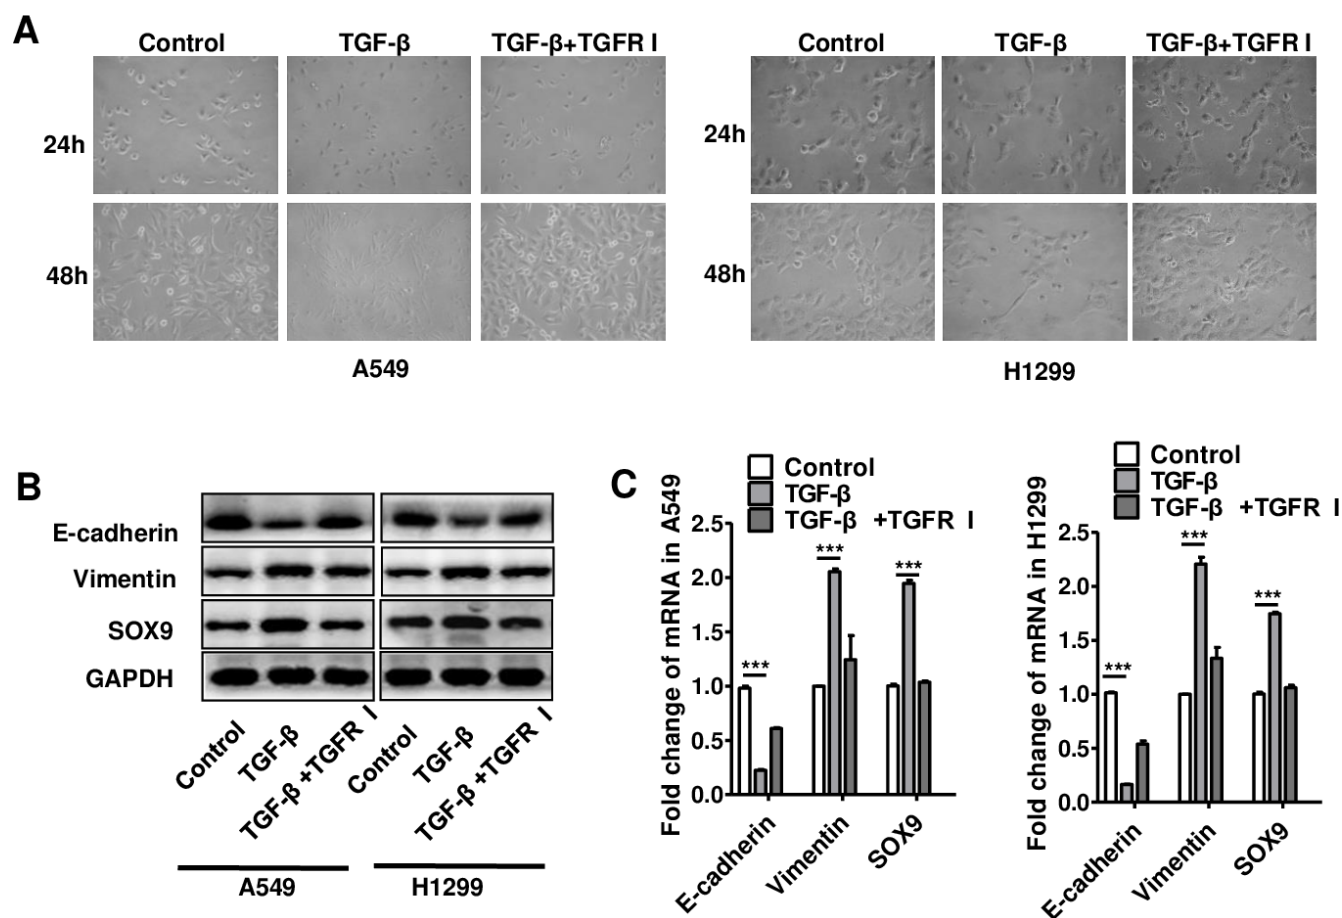

**Figure 5: TGF- $\beta$  increased SOX9 expression and induced transformation into an EMT-like phenotype in lung cancer cells.** (A) Changes in lung cancer cell morphology after recombinant TGF- $\beta$  (10ng/ml) or TGF- $\beta$  receptor inhibitor (TGFR I, SD208, 1 $\mu$ M) was added to A549 and H1299 cell culture systems for 24 or 48 h. (B–C) Changes in SOX9, E-cadherin, and vimentin protein (B) and mRNA (C) levels in lung cancer cells after recombinant TGF- $\beta$  or TGFR I was added to A549 and H1299 cell culture systems for 48 h. \*\*\* $p$  < 0.01, mean  $\pm$  SEM.
